# Supplementary material for: Estimates of burden and consequences of infants born small for gestational age in low and middle income countries with INTERGROWTH-21st standard: analysis of CHERG datasets
Source: PubMed Central journal article supplement (PMC5558898; doi:10.1136/bmj.j3677), 2017-08-17
Supplement: leea038389.ww1.pdf [file leea038389.ww1.pdf]

**Appendix 1: Descriptions of studies that contributed data on SGA prevalence and/or risk ratios between SGA and neonatal / infant mortality [posted as supplied by author]**

| Country (cohort year)             | Setting                                 | Primary study design                                                    | Population represented                                             | N (original cohort) | N (analyzed cohort) | NMR (per 1000 live births) | % LBW | % preterm | % SGA | % facility delivery | Method of gestational age assessment                  |
|-----------------------------------|-----------------------------------------|-------------------------------------------------------------------------|--------------------------------------------------------------------|---------------------|---------------------|----------------------------|-------|-----------|-------|---------------------|-------------------------------------------------------|
| Bangladesh (2005) <sup>3</sup>    | Rural Sylhet, BANGLADESH                | Cluster RCT of community sepsis treatment                               | Population-based recruitment of all pregnant women in study area   | 10,585              | 6,504               | 31                         | 30    | 19        | 50    | 6                   | LMP                                                   |
| India (2000) <sup>4</sup>         | Rural Tamil Nadu, INDIA                 | RCT of newborn Vitamin A supplementation                                | Population-based recruitment of all pregnant women in study area   | 12,936              | 9,506               | 38                         | 33    | 14        | 62    | 63                  | LMP                                                   |
| Nepal (1999) <sup>5</sup>         | Rural Sarlahi, NEPAL                    | Cluster RCT of multiple micronutrient supplementation                   | Population-based recruitment of all pregnant women in study area   | 4,130               | 3,319               | 42                         | 39    | 22        | 56    | 6                   | LMP                                                   |
| Nepal (2003) <sup>6</sup>         | Peri-Urban Dhanusha, NEPAL              | RCT of antenatal micronutrient supplementation                          | Antenatal clinic-based recruitment of pregnant women in study area | 1,106               | 1,052               | 25                         | 22    | 7         | 53    | 53                  | Ultrasound                                            |
| Nepal (2004) <sup>7</sup>         | Rural Sarlahi, NEPAL                    | Cluster RCT of newborn skin-umbilical cord cleansing with chlorhexidine | Population based recruitment of all pregnant women in study area   | 23,662              | 21,792              | 32                         | 30    | 18        | 52    | 10                  | LMP                                                   |
| Thailand (2001) <sup>8</sup>      | Rural areas and Urban Bangkok, THAILAND | Prospective follow-up of birth cohort                                   | Longitudinal birth cohort of all births in 5 districts             | 4,245               | 3,860               | 5                          | 8     | 9         | 22    | 99                  | Best obstetric estimate (LMP, ultrasound or neonatal) |
| Burkina Faso (2004) <sup>9</sup>  | Rural Hounde, BURKINA FASO              | RCT of multiple micronutrient supplementation                           | Prospective, community-based cohort                                | 1,373               | 1,060               | 21                         | 17    | 16        | 35    | 77                  | Ultrasound at recruitment                             |
| Burkina Faso (2006) <sup>10</sup> | Rural Hounde, BURKINA FASO              | RCT of maternal fortified food supplementation                          | Prospective, community-based cohort                                | 1,316               | 1,067               | 20                         | 16    | 18        | 29    | 84                  | Ultrasound at recruitment                             |

|                               |                                                        |                                                                  |                                                                            |        |        |       |    |    |    |     |                                        |
|-------------------------------|--------------------------------------------------------|------------------------------------------------------------------|----------------------------------------------------------------------------|--------|--------|-------|----|----|----|-----|----------------------------------------|
| Tanzania (2001) <sup>11</sup> | Urban Dar es Salaam, TANZANIA                          | RCT of multi-vitamin supplementation                             | Facility-based, ANC clinics                                                | 7,752  | 7,557  | 28    | 8  | 17 | 20 | 97  | LMP                                    |
| Tanzania (2008) <sup>12</sup> | Rural Korogwe, TANZANIA                                | Observational malaria study                                      | Facility-based recruitment, ANC clinics, community follow-up               | 915    | 777    | 33    | 11 | 5  | 22 | 88  | Ultrasound                             |
| Uganda (2005) <sup>13</sup>   | Rural Kabale district, UGANDA                          | RCT Intermittent preventive malaria therapy and insecticide nets | Facility-based recruitment ANC clinics; only include facility births       | 1,561  | 1,477  | 17    | 7  | 6  | 10 | 100 | Ballard external                       |
| Zimbabwe (1997) <sup>14</sup> | Urban Harare, ZIMBABWE                                 | RCT of maternal -neonatal Vitamin A supplementation              | Facility-based recruitment, 14 maternity clinics and hospitals             | 14,110 | 13,914 | 12*** | 14 | 8  | 33 | 100 | Capurro                                |
| Brazil (1993) <sup>15</sup>   | Urban Pelotas city, Rio Grande do Sul, Southern BRAZIL | Longitudinal Birth Cohort Survey                                 | Population-based, all births in Pelotas hospitals (100% facility delivery) | 5,279  | 4,632  | 7     | 9  | 11 | 19 | 100 | LMP and Dubowitz                       |
| Brazil (2004) <sup>16</sup>   | Urban Pelotas city, Rio Grande do Sul, Southern BRAZIL | Longitudinal Birth Cohort Survey                                 | Population-based, all births in Pelotas hospitals (100% facility delivery) | 4,287  | 3,837  | 10    | 11 | 16 | 15 | 100 | LMP, ultrasound if available, Dubowitz |

\*Only contributed SGA prevalence data.

\*\*Only contributed risk ratios between SGA and neonatal / infant mortality. Remaining datasets contributed both.

\*\*\*Newborns were enrolled  $\leq 96$  hours after birth.

**Abbreviations:** NMR= neonatal mortality rate, LBW= low birth weight (<2500g), SGA= small-for-gestational age, LMP = Last menstrual period
