# Supplementary material for: Estimates of burden and consequences of infants born small for gestational age in low and middle income countries with INTERGROWTH-21st standard: analysis of CHERG datasets
Source: PubMed Central journal article supplement (PMC5558898; doi:10.1136/bmj.j3677), 2017-08-17
Supplement: leea038389.ww2.pdf [file leea038389.ww2.pdf]

**Appendix 2** Conversion of Prevalence of SGA from US 1991 to Intergrowth-21<sup>st</sup> standard [posted as supplied by author]

We calculated the numbers and prevalence of Term-SGA and Preterm-SGA infants in 14 datasets using both the U.S. 1991 reference and the Intergrowth-21<sup>st</sup> standard (shown in Appendix 1). For each major geographic region, we estimated a “conversion factor” for Term-SGA and Preterm-SGA categories converting from the U.S. 1991 reference to the Intergrowth-21<sup>st</sup> standard. To calculate the conversion factor, the prevalence of term- and preterm-SGA was calculated at the individual study level using the aforementioned reference and standard. Random effects meta-analysis of proportions was performed at the regional level to calculate a pooled term- and preterm-SGA prevalence using each reference. The conversion factor was the ratio of the meta-analyzed prevalences of the Intergrowth-21<sup>st</sup> standard: U.S. 1991 reference. To calculate the proportion of Term-SGA infants (defined by Intergrowth standard) who were LBW for each major region (Africa, Asia, LAC), in each individual dataset the proportion of Term-SGA infants who were LBW was calculated and random effects meta-analysis was used to pool the data at the regional level.

Conversion factors used to calculate Intergrowth SGA prevalence (applied at country level)

|                                           | <b>Asia</b> | <b>Africa</b> | <b>LAC</b>  |
|-------------------------------------------|-------------|---------------|-------------|
| <b>Term-SGA</b>                           | 0.786343612 | 0.668141593   | 0.690789474 |
| <b>Preterm-SGA</b>                        | 0.529411765 | 0.526315789   | 0.571428571 |
| <b>Proportion of Term-SGA that is LBW</b> | 0.506       | 0.459         | 0.370       |

**Abbreviations:**

LAC= Latin American Countries

SGA= Small-for-gestational-age

LBW= low birth weight (<2500g)
