# Supplementary material for: Estimates of burden and consequences of infants born small for gestational age in low and middle income countries with INTERGROWTH-21st standard: analysis of CHERG datasets
Source: PubMed Central journal article supplement (PMC5558898; doi:10.1136/bmj.j3677), 2017-08-17
Supplement: leea038389.ww3.pdf [file leea038389.ww3.pdf]

**Appendix 3** Pooled risk ratios for neonatal mortality in 14 CHERG datasets, using the US 1991 reference and Intergrowth standard [posted as supplied by author]

|              | US 1991              | Intergrowth           |
|--------------|----------------------|-----------------------|
| Asia         |                      |                       |
| TSGA-not LBW | 1.18 (0.72, 1.92)    | 1.08 (0.67, 1.73)     |
| TSGA-LBW     | 2.88 (2.12, 3.92)    | 2.57 (1.96, 3.38)     |
| PSGA         | 10.29 (7.26, 14.60)  | 13.81 (10.26, 18.61)  |
| PAGA         | 3.16 (2.19, 4.54)    | 2.97 (2.38, 3.69)     |
| Asia         |                      |                       |
| TSGA-not LBW | 1.38 (1.01, 1.88)    | 2.62 (1.43, 4.80)     |
| TSGA-LBW     | 3.83 (2.78, 5.28)    | 4.26 (3.09, 5.87)     |
| PSGA         | 9.53 (6.82, 13.30)   | 10.51 (6.81, 16.22)   |
| PAGA         | 5.55 (2.87, 10.71)   | 6.12 (3.53, 10.63)    |
| Americas     |                      |                       |
| TSGA-not LBW | 2.38 (0.61, 9.27)    | 3.63 (0.94, 14.05)    |
| TSGA-LBW     | 8.59 (2.55, 28.95)   | 10.34 (3.31, 32.32)   |
| PSGA         | 35.65 (14.91, 85.28) | 75.28 (30.48, 185.96) |
| PAGA         | 17.81 (9.51, 33.35)  | 18.13 (9.62, 34.16)   |

**Abbreviations:**

TSGA= Term and Small-for-gestational-age; PSGA= Preterm and Small-for-gestational-age

TAGA= Term and appropriate-for-gestational-age; PAGA= Preterm and appropriate-for-gestational-age

LBW= low birth weight (<2500g)
