# Supplementary material for: Estimates of burden and consequences of infants born small for gestational age in low and middle income countries with INTERGROWTH-21st standard: analysis of CHERG datasets
Source: PubMed Central journal article supplement (PMC5558898; doi:10.1136/bmj.j3677), 2017-08-17
Supplement: leea038389.ww5.pdf [file leea038389.ww5.pdf]

Appendix 5:  
National-level Estimates of Small-for-Gestational-Age (SGA) Birth Prevalence for 138 LMIC Countries for 2012, using the INTERGROWTH 21st standard [posted as supplied by author]  
Version June 27, 2017

|         |                                       | Birth Prevalence in 2012 |                             |                                 |                       |                                      |                    |                        |                                 |                     |                            | Number of Births in 2012 |                            |                           |                           |                          |                  |    |                 |
|---------|---------------------------------------|--------------------------|-----------------------------|---------------------------------|-----------------------|--------------------------------------|--------------------|------------------------|---------------------------------|---------------------|----------------------------|--------------------------|----------------------------|---------------------------|---------------------------|--------------------------|------------------|----|-----------------|
| isocode | country                               | WHO region               | GBD region                  | UN-MDG Region                   | Live births 2012* (N) | Preterm Birth Prevalence (%) 2012*** | SGA Prevalence (%) | Uncertainty Range (UR) | Term-SGA-not-LBW Prevalence (%) |                     | Preterm-SGA Prevalence (%) |                          | Preterm birth              | Total SGA births (N)      |                           | Term-SGA-not-LBW (N)     | Term-SGA-LBW (N) |    | Preterm-SGA (N) |
|         |                                       |                          |                             |                                 |                       |                                      |                    |                        | UR                              | UR                  | UR                         | UR                       |                            | UR                        | UR                        |                          | UR               | UR |                 |
| AFG     | Afghanistan                           | EMRO                     | Asia South                  | Southern Asia                   | 1000000               | 36                                   | 11.5               | 30.8 (21.8 to 46.3)    | 14.5 (32.3 to 42.6)             | 14.9 (32.3 to 42.6) | 1.4 (1 to 5.3)             | 118900                   | 318100 (218000 to 462700)  | 150200 (98500 to 221300)  | 153800 (101000 to 229000) | 14100 (4800 to 34900)    |                  |    |                 |
| DZA     | Algeria                               | AFRO                     | North Africa/Middle East    | Northern Africa                 | 996086                | 11.6                                 | 7.4                | 6.9 (3.9 to 12.6)      | 3.4 (6.7 to 12.8)               | 2.9 (6.7 to 12.8)   | 0.6 (0.7 to 2.3)           | 73700                    | 68900 (38900 to 125500)    | 33900 (16800 to 64300)    | 28800 (14300 to 55800)    | 6200 (2500 to 15600)     |                  |    |                 |
| AGO     | Angola                                | AFRO                     | Sub-Saharan Africa Central  | Sub-Saharan Africa              | 906908                | 45.4                                 | 12.5               | 16.8 (9.9 to 28.5)     | 8.5 (20 to 27.2)                | 7.2 (20 to 27.2)    | 1.1 (0.8 to 4.1)           | 113400                   | 152500 (89400 to 258000)   | 73300 (34400 to 139500)   | 65600 (34000 to 117300)   | 9500 (3100 to 24800)     |                  |    |                 |
| ATG     | Antigua and Barbuda                   | AMRO                     | Caribbean                   | Latin America and the Caribbean | 1471                  | 5.5                                  | 5.8                | 6.1 (4.7 to 13.6)      | 3.3 (5 to 11.3)                 | 2.0 (5 to 11.3)     | 0.7 (0.8 to 2.5)           | 100                      | 89 (70 to 200)             | 49 (36 to 100)            | 29 (22 to 70)             | 11 (6 to 28)             |                  |    |                 |
| ARG     | Argentina                             | AMRO                     | Latin America Southern      | Latin America and the Caribbean | 705590                | 7.5                                  | 8.0                | 7.6 (6.3 to 16.6)      | 4.2 (6.6 to 13.4)               | 2.5 (6.6 to 13.4)   | 1.0 (1.5 to 1.9)           | 56400                    | 53500 (44700 to 117300)    | 29500 (22500 to 67800)    | 17300 (13400 to 40100)    | 6700 (4900 to 12600)     |                  |    |                 |
| ARM     | Armenia                               | EURO                     | Asia Central                | Caucasus and Central Asia       | 41695                 | 10.1                                 | 11.0               | 12.3 (7.7 to 19.6)     | 5.4 (9.4 to 20.1)               | 5.5 (9.4 to 20.1)   | 1.3 (1 to 5.3)             | 4600                     | 5100 (3200 to 8200)        | 2300 (1300 to 3800)       | 2300 (1300 to 3900)       | 500 (200 to 1400)        |                  |    |                 |
| AZE     | Azerbaijan                            | EURO                     | Asia Central                | Caucasus and Central Asia       | 170955                | 15                                   | 8.5                | 12.3 (7.7 to 19.7)     | 5.6 (9.8 to 20.6)               | 5.7 (9.8 to 20.6)   | 1.0 (1 to 4.1)             | 14500                    | 21000 (13200 to 33700)     | 9500 (5500 to 15900)      | 9700 (5700 to 16300)      | 1700 (700 to 4200)       |                  |    |                 |
| BHS     | Bahamas                               | AMRO                     | Caribbean                   | Latin America and the Caribbean | 6082                  | 7.7                                  | 9.5                | 11.3 (9.6 to 24)       | 6.4 (10.6 to 19.3)              | 6.1 (10.6 to 19.3)  | 1.1 (1.3 to 3.7)           | 600                      | 700 (600 to 1500)          | 400 (300 to 900)          | 200 (200 to 500)          | 68 (45 to 200)           |                  |    |                 |
| BHR     | Bahrain                               | EMRO                     | North Africa/Middle East    | Western Asia                    | 20474                 | 3.6                                  | 14.0               | 14.6 (9.3 to 22.8)     | 6.4 (11.6 to 22.8)              | 6.5 (11.6 to 22.8)  | 1.6 (2 to 4.2)             | 2900                     | 3000 (1900 to 4700)        | 1300 (800 to 2100)        | 1300 (800 to 2200)        | 300 (200 to 600)         |                  |    |                 |
| BGD     | Bangladesh                            | SEARO                    | Asia South                  | Southern Asia                   | 3100000               | 24.4                                 | 14.0               | 30.3 (20.8 to 43.9)    | 14.2 (32.6 to 42.1)             | 14.5 (32.6 to 42.1) | 1.6 (2.2 to 4.3)           | 435500                   | 943900 (288200 to 1361600) | 441000 (282000 to 648300) | 451700 (295200 to 668000) | 51300 (25500 to 107000)  |                  |    |                 |
| BRB     | Barbados                              | AMRO                     | Caribbean                   | Latin America and the Caribbean | 3644                  | 9.5                                  | 8.9                | 11.7 (9.9 to 24.5)     | 6.6 (11.1 to 19.7)              | 3.9 (11.1 to 19.7)  | 1.2 (1.2 to 3.3)           | 300                      | 400 (400 to 900)           | 200 (200 to 500)          | 100 (100 to 300)          | 43 (25 to 100)           |                  |    |                 |
| BLZ     | Belize                                | AMRO                     | Caribbean                   | Latin America and the Caribbean | 7750                  | 8.6                                  | 10.4               | 13.6 (11.7 to 28.9)    | 7.8 (13.1 to 23)                | 4.6 (13.1 to 23)    | 1.2 (1.5 to 4)             | 800                      | 1100 (900 to 2200)         | 600 (500 to 1300)         | 400 (300 to 800)          | 96 (62 to 300)           |                  |    |                 |
| BEN     | Benin                                 | AFRO                     | Sub-Saharan Africa West     | Sub-Saharan Africa              | 357338                | 27.8                                 | 10.6               | 17.0 (9.9 to 28.9)     | 8.7 (20 to 27.6)                | 7.6 (20 to 27.6)    | 0.9 (0.9 to 3.6)           | 37900                    | 60700 (35400 to 103100)    | 31100 (16600 to 56500)    | 26400 (13800 to 47300)    | 3200 (1300 to 8000)      |                  |    |                 |
| BTN     | Bhutan                                | SEARO                    | Asia South                  | Southern Asia                   | 14850                 | 21.2                                 | 10.2               | 16.5 (10.6 to 25.2)    | 7.6 (14.5 to 25.6)              | 7.7 (14.5 to 25.6)  | 1.2 (0.9 to 5)             | 1500                     | 2400 (1600 to 3700)        | 1100 (700 to 1800)        | 1100 (700 to 1800)        | 200 (65 to 500)          |                  |    |                 |
| BOL     | Bolivia                               | AMRO                     | Latin America Andean        | Latin America and the Caribbean | 263587                | 18.9                                 | 8.1                | 6.6 (5 to 14)          | 3.5 (5.4 to 11.6)               | 1.0 (0.4 to 1.6)    | 23700                      | 17300 (13100 to 36900)   | 9300 (7200 to 22200)       | 5500 (4200 to 13100)      | 2600 (700 to 3400)        |                          |                  |    |                 |
| BWA     | Botswana                              | AFRO                     | Sub-Saharan Africa Southern | Sub-Saharan Africa              | 48531                 | 28.5                                 | 15.1               | 13.3 (7.6 to 22.6)     | 6.5 (12.9 to 22.8)              | 5.5 (12.9 to 22.8)  | 1.3 (0.9 to 4)             | 7300                     | 6400 (3700 to 11000)       | 3200 (1600 to 5700)       | 2700 (1300 to 4800)       | 600 (200 to 1500)        |                  |    |                 |
| BRA     | Brazil                                | AMRO                     | Latin America Tropical      | Latin America and the Caribbean | 2900000               | 9.2                                  | 9.2                | 9.0 (7.5 to 19.5)      | 5.0 (8.2 to 15.5)               | 2.9 (8.2 to 15.5)   | 1.1 (1.2 to 3.1)           | 266500                   | 261700 (218600 to 565800)  | 144700 (113500 to 323900) | 85000 (67400 to 192500)   | 31900 (19200 to 72200)   |                  |    |                 |
| BRN     | Brunei Darussalam                     | WPRO                     | Asia Pacific High Income    | South-eastern Asia              | 6209                  | 4.4                                  | 12.1               | 15.6 (10.1 to 24.5)    | 7.0 (13.1 to 24.6)              | 7.2 (13.1 to 24.6)  | 1.4 (1.2 to 6.1)           | 800                      | 1000 (600 to 1500)         | 400 (300 to 700)          | 400 (300 to 700)          | 87 (29 to 200)           |                  |    |                 |
| BFA     | Burkina Faso                          | AFRO                     | Sub-Saharan Africa West     | Sub-Saharan Africa              | 655851                | 27.5                                 | 10.9               | 13.7 (8.1 to 22.9)     | 6.9 (15.9 to 22.3)              | 5.8 (15.9 to 22.3)  | 0.9 (1 to 2.6)             | 71500                    | 89600 (53300 to 150300)    | 45200 (24500 to 81300)    | 38300 (19800 to 68200)    | 6000 (2500 to 13000)     |                  |    |                 |
| BDI     | Burundi                               | AFRO                     | Sub-Saharan Africa East     | Sub-Saharan Africa              | 428114                | 35.5                                 | 11.4               | 15.5 (8.8 to 26.4)     | 7.9 (18.4 to 25.2)              | 6.7 (18.4 to 25.2)  | 1.0 (0.7 to 3.9)           | 48800                    | 66400 (37700 to 113200)    | 33700 (18400 to 61200)    | 28600 (14900 to 51200)    | 4100 (1300 to 11400)     |                  |    |                 |
| KHM     | Cambodia                              | WPRO                     | Asia Southeast              | South-eastern Asia              | 362078                | 18.4                                 | 10.5               | 14.1 (9.3 to 22.1)     | 6.4 (11.6 to 22.5)              | 6.5 (11.6 to 22.5)  | 1.2 (1 to 5.2)             | 38000                    | 51200 (33600 to 80000)     | 23600 (14200 to 37600)    | 23600 (14200 to 38800)    | 4500 (1500 to 12000)     |                  |    |                 |
| CMR     | Cameroon                              | AFRO                     | Sub-Saharan Africa West     | Sub-Saharan Africa              | 787199                | 27.9                                 | 12.6               | 13.8 (8 to 23.1)       | 6.9 (15.9 to 22.4)              | 5.9 (15.9 to 22.4)  | 1.1 (1 to 3.7)             | 99200                    | 109000 (63300 to 182100)   | 54500 (29400 to 98100)    | 46200 (23900 to 82200)    | 8400 (3000 to 18800)     |                  |    |                 |
| CPV     | Cape Verde                            | AFRO                     | Sub-Saharan Africa West     | Sub-Saharan Africa              | 10120                 | 10                                   | 11.2               | 7.0 (4 to 12.4)        | 3.2 (6.2 to 12.5)               | 2.8 (6.2 to 12.5)   | 1.0 (0.7 to 3)             | 1100                     | 700 (400 to 1300)          | 300 (100 to 600)          | 300 (100 to 500)          | 100 (33 to 200)          |                  |    |                 |
| CAF     | Central African Republic              | AFRO                     | Sub-Saharan Africa Central  | Sub-Saharan Africa              | 150396                | 40.9                                 | 12.6               | 17.8 (10.4 to 30.5)    | 9.0 (21.1 to 28.7)              | 7.7 (21.1 to 28.7)  | 1.1 (0.8 to 4.6)           | 18900                    | 26700 (15600 to 45900)     | 13600 (7400 to 24200)     | 11500 (6000 to 20700)     | 1600 (500 to 4400)       |                  |    |                 |
| TCD     | Chad                                  | AFRO                     | Sub-Saharan Africa West     | Sub-Saharan Africa              | 554832                | 39.7                                 | 13.1               | 24.3 (14 to 40.8)      | 12.5 (29.5 to 39.8)             | 10.6 (29.5 to 39.8) | 1.1 (0.8 to 4.5)           | 72700                    | 134700 (77500 to 226400)   | 69600 (37000 to 122500)   | 59000 (30900 to 108800)   | 6100 (2000 to 16300)     |                  |    |                 |
| CHL     | Chile                                 | AMRO                     | Latin America Southern      | Latin America and the Caribbean | 246377                | 5.3                                  | 7.1                | 6.4 (5.3 to 14.5)      | 3.5 (5.3 to 11.7)               | 2.1 (5.3 to 11.7)   | 0.8 (1.3 to 1.7)           | 17500                    | 15900 (13000 to 35700)     | 8700 (8400 to 20300)      | 5100 (3800 to 12100)      | 2100 (1500 to 3900)      |                  |    |                 |
| CHN     | China                                 | WPRO                     | Asia East                   | Eastern Asia                    | 19000000              | 8.5                                  | 7.1                | 4.7 (2.6 to 8.4)       | 1.9 (2.3 to 9.2)                | 1.9 (2.3 to 9.2)    | 0.8 (1.1 to 2)             | 1315000                  | 865600 (485400 to 1600100) | 371400 (152100 to 731400) | 359900 (160000 to 736100) | 154400 (73300 to 299400) |                  |    |                 |
| COL     | Colombia                              | AMRO                     | Latin America Central       | Latin America and the Caribbean | 914535                | 11.2                                 | 8.8                | 9.6 (8.2 to 20.6)      | 5.4 (9 to 16.4)                 | 3.2 (9 to 16.4)     | 1.1 (1.3 to 2.2)           | 80500                    | 87800 (74800 to 188500)    | 49300 (39400 to 109600)   | 28900 (23300 to 64900)    | 9600 (6400 to 18300)     |                  |    |                 |
| COM     | Comoros                               | AFRO                     | Sub-Saharan Africa East     | Sub-Saharan Africa              | 24930                 | 31                                   | 16.7               | 24.8 (14 to 41.3)      | 12.6 (28.8 to 40.5)             | 10.7 (28.8 to 40.5) | 1.4 (1.1 to 5)             | 4200                     | 6200 (3500 to 10300)       | 3100 (1600 to 5600)       | 2700 (1400 to 4900)       | 400 (100 to 800)         |                  |    |                 |
| COG     | Congo                                 | AFRO                     | Sub-Saharan Africa Central  | Sub-Saharan Africa              | 162254                | 31.7                                 | 16.7               | 16.1 (9.7 to 26.3)     | 7.9 (18.2 to 25.4)              | 6.7 (18.2 to 25.4)  | 1.4 (1.1 to 4.2)           | 27100                    | 26100 (15700 to 42700)     | 12900 (6900 to 23400)     | 10900 (5700 to 19500)     | 2300 (800 to 5200)       |                  |    |                 |
| CRI     | Costa Rica                            | AMRO                     | Latin America Central       | Latin America and the Caribbean | 72676                 | 6.6                                  | 13.6               | 7.5 (6 to 16.2)        | 2.2 (5.6 to 12.1)               | 2.2 (5.6 to 12.1)   | 1.6 (1.2 to 5.1)           | 9900                     | 5400 (4400 to 11800)       | 2700 (2000 to 6200)       | 1600 (1200 to 3700)       | 1200 (500 to 2900)       |                  |    |                 |
| CIV     | Cote d'Ivoire                         | AFRO                     | Sub-Saharan Africa West     | Sub-Saharan Africa              | 714453                | 39.9                                 | 14.0               | 20.4 (11.8 to 34)      | 10.4 (24.6 to 32.7)             | 8.8 (24.6 to 32.7)  | 1.2 (0.9 to 4.7)           | 100000                   | 145700 (84500 to 243100)   | 74300 (40100 to 132300)   | 63000 (33200 to 112900)   | 8500 (2500 to 23700)     |                  |    |                 |
| CUB     | Cuba                                  | AMRO                     | Caribbean                   | Latin America and the Caribbean | 101941                | 2.6                                  | 6.4                | 5.6 (4.5 to 12.9)      | 3.1 (4.5 to 10.5)               | 0.8 (1.1 to 1.7)    | 5800 (4600 to 13100)       | 6500                     | 5800 (4600 to 13100)       | 3100 (2300 to 7500)       | 1800 (1400 to 4500)       | 800 (500 to 1500)        |                  |    |                 |
| PRK     | Democratic People's Republic of Korea | SEARO                    | Asia East                   | Eastern Asia                    | 346634                | 15.6                                 | 10.7               | 12.0 (7.4 to 19.5)     | 5.3 (9.2 to 19.9)               | 5.4 (9.2 to 19.9)   | 1.3 (1 to 5)               | 37100                    | 41600 (25800 to 67500)     | 18400 (10500 to 30900)    | 18800 (10800 to 31800)    | 4400 (1500 to 11900)     |                  |    |                 |
| COD     | Democratic Republic of the Congo      | AFRO                     | Sub-Saharan Africa Central  | Sub-Saharan Africa              | 2700000               | 43.5                                 | 11.9               | 14.4 (8.7 to 24.9)     | 7.2 (16.3 to 23.6)              | 6.1 (16.3 to 23.6)  | 1.0 (0.8 to 4)             | 323100                   | 390200 (234000 to 672700)  | 196300 (108600 to 360000) | 166600 (86700 to 301500)  | 27300 (8600 to 75200)    |                  |    |                 |
| DJI     | Djibouti                              | EMRO                     | Sub-Saharan Africa East     | Sub-Saharan Africa              | 23582                 | 31.4                                 | 11.9               | 21.3 (12.3 to 35.5)    | 11.0 (25.2 to 34.7)             | 9.1 (25.2 to 34.7)  | 1.0 (0.7 to 4)             | 2800                     | 5000 (2900 to 8400)        | 2600 (1400 to 4500)       | 200 (69 to 200)           | 200 (69 to 200)          |                  |    |                 |
| DMA     | Dominica                              | AMRO                     | Caribbean                   | Latin America and the Caribbean | 1072                  | 9                                    | 11.9               | 9.8 (8.6 to 22.3)      | 5.6 (9.2 to 17.1)               | 3.3 (9.2 to 17.1)   | 1.0 (1.4 to 5.6)           | 100                      | 100 (93 to 200)            | 60 (48 to 100)            | 35 (28 to 78)             | 11 (9 to 46)             |                  |    |                 |
| DOM     | Dominican Republic                    | AMRO                     | Caribbean                   | Latin America and the Caribbean | 214493                | 15                                   | 10.8               | 9.0 (7.5 to 19.4)      | 4.8 (8 to 14.8)                 | 2.8 (8 to 14.8)     | 1.3 (1.2 to 4.7)           | 23200                    | 19200 (16100 to 41700)     | 10400 (8200 to 23300)     | 6100 (4800 to 13800)      | 2800 (1500 to 7500)      |                  |    |                 |
| ECU     | Ecuador                               | AMRO                     | Latin America Andean        | Latin America and the Caribbean | 324415                | 10.3                                 | 5.1                | 6.6 (5.3 to 14.7)      | 3.8 (5.8 to 12.2)               | 2.2 (5.8 to 12.2)   | 0.6 (0.5 to 4.6)           | 16500                    | 21300 (17300 to 47800)     | 12200 (9500 to 28300)     | 7200 (5500 to 16700)      | 2000 (1000 to 6600)      |                  |    |                 |
| EGY     | Egypt                                 | EMRO                     | North Africa/Middle East    | Northern Africa                 | 1900000               | 11.8                                 | 7.3                | 6.5 (3.6 to 12.1)      | 3.2 (5.8 to 12.2)               | 2.7 (5.8 to 12.2)   | 0.6 (0.5 to 2)             | 140700                   | 124400 (68400 to 229400)   | 60900 (29800 to 118000)   | 51700 (25000 to 102100)   | 11900 (4100 to 27500)    |                  |    |                 |
| SLV     | El Salvador                           | AMRO                     | Latin America Central       | Latin America and the Caribbean | 135842                | 6.3                                  | 12.8               | 10.3 (8.3 to 22.2)     | 5.5 (9 to 16.9)                 | 3.2 (9 to 16.9)     | 1.5 (1.1 to 6.3)           | 17400                    | 13900 (11300 to 30200)     | 5400 (3500 to 9900)       | 4700 (2900 to 10200)      | 2100 (900 to 6800)       |                  |    |                 |
| GNQ     | Equatorial Guinea                     | AFRO                     | Sub-Saharan Africa Central  | Sub-Saharan Africa              | 25496                 | 34.1                                 | 16.5               | 16.7 (9.7 to 27.8)     | 8.3 (19.3 to 26.2)              | 7.0 (19.3 to 26.2)  | 1.4 (1.1 to 5.1)           | 4200                     | 4200 (2500 to 7100)        | 2100 (1100 to 3800)       | 1800 (900 to 3200)        | 400 (100 to 1000)        |                  |    |                 |
| ERI     | Eritrea                               | AFRO                     | Sub-Saharan Africa East     | Sub-Saharan Africa              | 221678                | 18.2                                 | 12.2               | 15.1 (8.7 to 25.9)     | 7.6 (16.4 to 25.3)              | 6.5 (16.4 to 25.3)  | 1.0 (0.9 to 4)             | 27000                    | 33500 (19200 to 57300)     | 16900 (8800 to 30200)     | 14300 (7300 to 25600)     | 2300 (800 to 6100)       |                  |    |                 |
| ETH     | Ethiopia                              | AFRO                     | Sub-Saharan Africa East     | Sub-Saharan Africa              | 3000000               | 29                                   | 10.1               | 21.2 (12.2 to 35.9)    | 11.0 (25.4 to 35.1)             | 9.9 (25.4 to 35.1)  | 0.9 (0.9 to 2.3)           | 305900                   | 642200 (365900 to 1076900) | 333400 (174700 to 582400) | 282900 (148000 to 511300) | 25800 (8000 to 51400)    |                  |    |                 |
| FJI     | Fiji                                  | WPRO                     | Oceania                     | Oceania                         | 18397                 | 9.9                                  | 9.9                | 13.6 (8.7 to 21.7)     | 6.2 (11.1 to 22)                | 6.3 (11.1 to 22)    | 1.1 (0.9 to 4.3)           | 1800                     | 2500 (1600 to 4000)        | 1100 (700 to 1900)        | 1200 (700 to 1900)        | 200 (79 to 600)          |                  |    |                 |
| GAB     | Gabon                                 | AFRO                     | Sub-Saharan Africa Central  | Sub-Saharan Africa              | 52030                 | 24.9                                 | 16.3               | 16.0 (9.5 to 26.9)     | 7.9 (17.5 to 25.8)              | 6.7 (17.5 to 25.8)  | 1.4 (1.1 to 4.9)           | 8500                     | 8300 (5000 to 14000)       | 4100 (2200 to 9000)       | 3500 (1800 to 6300)       | 700 (200 to 1800)        |                  |    |                 |
| GMB     | Gambia                                | AFRO                     | Sub-Saharan Africa West     | Sub-Saharan Africa              | 74548                 | 28                                   | 14.0               | 21.6 (12.7 to 35.8)    | 11.1 (25.5 to 34.9)             | 9.4 (25.5 to 34.9)  | 1.2 (0.9 to 4.9)           | 10400                    | 16100 (9400 to 2           |                           |                           |                          |                  |    |                 |



|     |                                  |       |                             |                                 |         |      |      |                     |                     |                     |                  |        |                              |                            |                            |                         |
|-----|----------------------------------|-------|-----------------------------|---------------------------------|---------|------|------|---------------------|---------------------|---------------------|------------------|--------|------------------------------|----------------------------|----------------------------|-------------------------|
| NGA | Nigeria                          | AFRO  | Sub-Saharan Africa West     | Sub-Saharan Africa              | 6800000 | 39.2 | 12.2 | 15.6 (9.1 to 26.3)  | 7.9 (18.5 to 25.1)  | 6.7 (18.5 to 25.1)  | 1.0 (1.2 to 2.8) | 831100 | 1061900 (622200 to 1790000)  | 536400 (291300 to 975700)  | 455100 (237200 to 811800)  | 70300 (30400 to 145900) |
| OMN | Oman                             | EMRO  | North Africa/Middle East    | Western Asia                    | 75414   | 6.7  | 14.3 | 14.8 (9.5 to 23.1)  | 6.5 (11.9 to 22.9)  | 6.7 (11.9 to 22.9)  | 1.7 (1.7 to 4.8) | 10800  | 11200 (7100 to 17400)        | 4900 (2900 to 8000)        | 5000 (3000 to 8200)        | 1300 (500 to 2800)      |
| PAK | Pakistan                         | EMRO  | Asia South                  | Southern Asia                   | 4800000 | 42.2 | 15.8 | 36.0 (24.8 to 52.3) | 16.9 (39.4 to 49.9) | 17.3 (39.4 to 49.9) | 1.9 (2.2 to 5)   | 757900 | 1729200 (1190200 to 2508800) | 810100 (528900 to 1193700) | 829800 (544000 to 1230100) | 89300 (40600 to 186400) |
| PAN | Panama                           | AMRO  | Latin America Central       | Latin America and the Caribbean | 74857   | 8.5  | 8.1  | 8.9 (7.4 to 19.2)   | 5.0 (8.1 to 15.5)   | 2.9 (8.1 to 15.5)   | 1.0 (1.1 to 2.9) | 6100   | 6600 (5600 to 14400)         | 3700 (2900 to 8300)        | 2200 (1700 to 5000)        | 700 (500 to 1700)       |
| PNG | Papua New Guinea                 | WPRO  | Oceania                     | Oceania                         | 208751  | 24.3 | 6.5  | 16.6 (10.8 to 25.9) | 7.8 (15.2 to 26.1)  | 8.0 (15.2 to 26.1)  | 0.8 (0.7 to 3.7) | 13600  | 34700 (22500 to 54000)       | 16300 (10000 to 25800)     | 16700 (10600 to 26600)     | 1600 (600 to 5100)      |
| PRY | Paraguay                         | AMRO  | Latin America Tropical      | Latin America and the Caribbean | 156881  | 12.4 | 7.8  | 7.3 (6.1 to 16.1)   | 4.0 (6.3 to 12.8)   | 2.3 (6.3 to 12.8)   | 0.9 (0.9 to 4.4) | 12200  | 11400 (9500 to 25300)        | 6300 (4800 to 14400)       | 3700 (2800 to 8500)        | 1500 (800 to 4900)      |
| PER | Peru                             | AMRO  | Latin America Andean        | Latin America and the Caribbean | 594722  | 9.3  | 7.3  | 7.7 (6.3 to 16.7)   | 4.3 (6.9 to 13.5)   | 5.8 (9.7 to 17.7)   | 0.9 (0.9 to 2.4) | 43400  | 45600 (37200 to 99400)       | 25400 (19400 to 58000)     | 14900 (11500 to 34500)     | 5200 (3100 to 11600)    |
| PHL | Philippines                      | WPRO  | Asia Southeast              | South-eastern Asia              | 2300000 | 14   | 14.9 | 25.5 (17.2 to 37.9) | 11.7 (25.5 to 36.7) | 12.0 (25.5 to 36.7) | 1.8 (1.4 to 6.8) | 343400 | 588400 (395600 to 871500)    | 270700 (172000 to 404800)  | 277300 (176400 to 419700)  | 40500 (14700 to 104300) |
| QAT | Qatar                            | EMRO  | North Africa/Middle East    | Western Asia                    | 21528   | 3.9  | 10.5 | 11.0 (6.8 to 18.1)  | 4.8 (8 to 18.5)     | 4.9 (8 to 18.5)     | 1.3 (0.9 to 4.9) | 2300   | 2400 (1500 to 3900)          | 1000 (600 to 1800)         | 1100 (600 to 1800)         | 300 (97 to 700)         |
| KOR | Republic of Korea                | WPRO  | Asia East                   | Eastern Asia                    | 509453  | 1.6  | 9.2  | 7.3 (4.1 to 12.7)   | 3.1 (4.4 to 13.4)   | 3.1 (4.4 to 13.4)   | 1.1 (1.1 to 3.9) | 46900  | 37200 (20900 to 64800)       | 15600 (7900 to 29200)      | 16000 (8100 to 29700)      | 5500 (2200 to 12700)    |
| RWA | Rwanda                           | AFRO  | Sub-Saharan Africa East     | Sub-Saharan Africa              | 443228  | 20.9 | 9.5  | 8.0 (4.5 to 14.3)   | 3.9 (8.1 to 14.2)   | 3.3 (8.1 to 14.2)   | 0.8 (0.6 to 3.6) | 42100  | 35500 (20200 to 63600)       | 17300 (8800 to 32100)      | 14700 (7400 to 27800)      | 3600 (1200 to 10200)    |
| LCA | Saint Lucia                      | AMRO  | Caribbean                   | Latin America and the Caribbean | 2862    | 10.4 | 11.1 | 10.4 (8.8 to 22.9)  | 5.8 (9.7 to 17.7)   | 3.4 (9.7 to 17.7)   | 1.2 (1.2 to 4.5) | 300    | 300 (300 to 700)             | 200 (100 to 400)           | 98 (78 to 200)             | 33 (21 to 100)          |
| VCT | Saint Vincent and the Grenadines | AMRO  | Caribbean                   | Latin America and the Caribbean | 1861    | 14.6 | 11.8 | 9.0 (7.7 to 19.9)   | 4.9 (8.1 to 15)     | 2.9 (8.1 to 15)     | 1.3 (1.3 to 5.2) | 200    | 200 (100 to 400)             | 91 (72 to 200)             | 53 (42 to 100)             | 23 (15 to 72)           |
| WSM | Samoa                            | WPRO  | Oceania                     | Oceania                         | 5153    | 7.2  | 5.5  | 2.5 (1.2 to 5.5)    | 1.0 (1 to 5.7)      | 1.0 (1 to 5.7)      | 0.5 (0.5 to 2.8) | 300    | 100 (63 to 300)              | 49 (18 to 100)             | 50 (18 to 100)             | 27 (12 to 93)           |
| STP | Sao Tome and Principe            | AFRO  | Sub-Saharan Africa West     | Sub-Saharan Africa              | 6421    | 19.9 | 10.5 | 10.2 (6 to 17.5)    | 5.1 (11 to 17.4)    | 5.1 (11 to 17.4)    | 0.8 (0.7 to 3.5) | 700    | 700 (400 to 1100)            | 300 (200 to 600)           | 300 (100 to 500)           | 52 (17 to 100)          |
| SAU | Saudi Arabia                     | EMRO  | North Africa/Middle East    | Western Asia                    | 559323  | 5.2  | 6.0  | 11.1 (6.7 to 18.5)  | 5.2 (8.8 to 19.4)   | 5.3 (8.8 to 19.4)   | 0.7 (0.8 to 1.8) | 33600  | 62300 (37400 to 103600)      | 28800 (16400 to 49300)     | 29500 (16800 to 50300)     | 4000 (1200 to 7600)     |
| SEN | Senegal                          | AFRO  | Sub-Saharan Africa West     | Sub-Saharan Africa              | 511506  | 24.4 | 9.7  | 19.2 (11 to 32.4)   | 9.9 (22.2 to 31.9)  | 9.9 (22.2 to 31.9)  | 0.8 (0.7 to 3.9) | 49600  | 98100 (56300 to 165700)      | 50800 (26300 to 90400)     | 43100 (22200 to 78500)     | 4200 (1400 to 12700)    |
| SYC | Seychelles                       | AFRO  | Asia Southeast              | Sub-Saharan Africa              | 1471    | 8.3  | 11.6 | 10.0 (5.8 to 17.9)  | 5.0 (9.7 to 18.2)   | 4.3 (9.7 to 18.2)   | 0.8 (0.8 to 4)   | 200    | 100 (85 to 300)              | 74 (37 to 100)             | 63 (31 to 100)             | 11 (5 to 39)            |
| SLE | Sierra Leone                     | AFRO  | Sub-Saharan Africa West     | Sub-Saharan Africa              | 211899  | 49.5 | 10.0 | 18.7 (11.1 to 32.3) | 9.7 (22.7 to 30.8)  | 8.2 (22.7 to 30.8)  | 0.8 (0.6 to 3.3) | 21200  | 39700 (23500 to 68500)       | 20500 (11100 to 36900)     | 17400 (9100 to 31600)      | 1800 (600 to 5000)      |
| SGP | Singapore                        | WPRO  | Asia Pacific High Income    | South-eastern Asia              | 55968   | 1.2  | 11.5 | 13.3 (8.2 to 21.3)  | 5.9 (10.4 to 21.5)  | 6.0 (10.4 to 21.5)  | 1.4 (1.1 to 5.4) | 6400   | 7400 (4600 to 11900)         | 3300 (1900 to 5500)        | 3400 (2000 to 5600)        | 800 (300 to 1900)       |
| SLB | Solomon Islands                  | WPRO  | Oceania                     | Oceania                         | 17028   | 13.8 | 12.4 | 18.2 (11.9 to 27.5) | 8.3 (16.3 to 27.3)  | 8.5 (16.3 to 27.3)  | 1.4 (1.2 to 6)   | 2100   | 3100 (2000 to 4700)          | 1400 (900 to 2200)         | 1400 (900 to 2300)         | 200 (89 to 700)         |
| SOM | Somalia                          | EMRO  | Sub-Saharan Africa East     | Sub-Saharan Africa              | 444651  | 45.7 | 12.0 | 16.5 (9.6 to 28.1)  | 8.4 (19.2 to 27.1)  | 7.1 (19.2 to 27.1)  | 1.0 (0.8 to 3.8) | 53400  | 73300 (42500 to 124800)      | 37200 (20300 to 67900)     | 31600 (16500 to 57700)     | 4500 (1600 to 12200)    |
| ZAF | South Africa                     | AFRO  | Sub-Saharan Africa Southern | Sub-Saharan Africa              | 1100000 | 15.3 | 8.0  | 15.2 (8.5 to 26.5)  | 7.9 (16 to 25.2)    | 6.7 (16 to 25.2)    | 0.7 (0.7 to 2.7) | 88300  | 168000 (93300 to 291200)     | 86800 (45200 to 155200)    | 73700 (37400 to 131700)    | 7500 (2800 to 19100)    |
| LKA | Sri Lanka                        | SEARO | Asia Southeast              | Southern Asia                   | 382027  | 6.1  | 10.7 | 18.5 (12.1 to 27.9) | 8.5 (16.7 to 28.1)  | 8.7 (16.7 to 28.1)  | 1.3 (1.4 to 4.2) | 40900  | 70500 (46100 to 106600)      | 32500 (19900 to 50000)     | 33200 (20800 to 51900)     | 4800 (2100 to 11100)    |
| SDN | Sudan                            | EMRO  | Sub-Saharan Africa East     | Sub-Saharan Africa              | 1200000 | 28.6 | 13.2 | 27.5 (15.8 to 47.2) | 14.3 (32.8 to 47.4) | 12.1 (32.8 to 47.4) | 1.1 (1.2 to 3.4) | 161200 | 336300 (190000 to 566600)    | 174600 (89700 to 311200)   | 148100 (75500 to 272100)   | 13600 (5200 to 28100)   |
| SUR | Suriname                         | AMRO  | Caribbean                   | Latin America and the Caribbean | 9437    | 11.7 | 8.8  | 11.7 (10.2 to 24.5) | 6.7 (11.5 to 19.6)  | 3.9 (11.5 to 19.6)  | 1.1 (1.2 to 3.3) | 800    | 1100 (1000 to 2300)          | 600 (500 to 1400)          | 400 (300 to 800)           | 100 (61 to 300)         |
| SWZ | Swaziland                        | AFRO  | Sub-Saharan Africa Southern | Sub-Saharan Africa              | 36777   | 29.5 | 13.9 | 12.5 (7.5 to 21)    | 6.1 (13.9 to 20.4)  | 5.2 (13.9 to 20.4)  | 1.2 (1 to 4.6)   | 5100   | 4600 (2800 to 7700)          | 2300 (1200 to 4100)        | 1900 (1000 to 3400)        | 400 (100 to 1200)       |
| SYR | Syrian Arab Republic             | EMRO  | North Africa/Middle East    | Western Asia                    | 535264  | 8.5  | 10.9 | 14.3 (9.2 to 22.6)  | 6.5 (11.9 to 22.8)  | 6.6 (11.9 to 22.8)  | 1.3 (1 to 5.3)   | 58300  | 76800 (49400 to 121000)      | 34500 (20400 to 56200)     | 35400 (21300 to 57700)     | 6900 (2300 to 18000)    |
| TJK | Tajikistan                       | EURO  | Asia Central                | Caucasus and Central Asia       | 269759  | 23   | 10.7 | 12.8 (7.9 to 20.4)  | 5.7 (10 to 21)      | 5.8 (10 to 21)      | 1.3 (1 to 4.8)   | 28900  | 34500 (21200 to 55200)       | 15400 (8800 to 25400)      | 15700 (9200 to 26400)      | 3400 (1200 to 9200)     |
| THA | Thailand                         | SEARO | Asia Southeast              | South-eastern Asia              | 698934  | 8.1  | 12.0 | 14.1 (9 to 22.3)    | 6.3 (11.4 to 22.3)  | 6.4 (11.4 to 22.3)  | 1.4 (1.8 to 3.7) | 83900  | 98600 (63100 to 155600)      | 43800 (25800 to 71900)     | 44900 (26800 to 73500)     | 9900 (4800 to 20500)    |
| TLS | Timor-Leste                      | SEARO | Asia Southeast              | South-eastern Asia              | 42075   | 24.4 | 12.1 | 20.0 (13.4 to 29.9) | 9.2 (18.7 to 29.6)  | 9.4 (18.7 to 29.6)  | 1.4 (1.2 to 5.9) | 5100   | 8400 (5700 to 12600)         | 3900 (2400 to 5900)        | 4000 (2500 to 6200)        | 600 (200 to 1600)       |
| TGO | Togo                             | AFRO  | Sub-Saharan Africa West     | Sub-Saharan Africa              | 238470  | 32.6 | 13.3 | 14.9 (8.7 to 25.1)  | 7.5 (17.3 to 23.9)  | 6.3 (17.3 to 23.9)  | 1.1 (0.9 to 4.6) | 31700  | 35600 (20700 to 59800)       | 17800 (9600 to 32200)      | 15100 (7900 to 26900)      | 2700 (900 to 7200)      |
| TON | Tonga                            | WPRO  | Oceania                     | Oceania                         | 2703    | 6.6  | 7.5  | 5.5 (3.1 to 10.2)   | 2.3 (3 to 10.9)     | 2.4 (3 to 10.9)     | 0.8 (0.7 to 3.4) | 200    | 100 (83 to 300)              | 62 (29 to 100)             | 64 (30 to 100)             | 23 (9 to 66)            |
| TTO | Trinidad and Tobago              | AMRO  | Caribbean                   | Latin America and the Caribbean | 19543   | 14.8 | 8.1  | 11.2 (9.8 to 24)    | 6.5 (11.1 to 19)    | 3.8 (11.1 to 19)    | 1.0 (1.1 to 3)   | 1600   | 2200 (1900 to 4700)          | 1300 (1000 to 2800)        | 700 (600 to 1600)          | 200 (100 to 500)        |
| TUN | Tunisia                          | EMRO  | North Africa/Middle East    | Northern Africa                 | 190386  | 9.5  | 8.9  | 6.2 (3.5 to 11.2)   | 2.9 (5.4 to 11.7)   | 2.5 (5.4 to 11.7)   | 0.7 (0.7 to 2.6) | 16900  | 11800 (6600 to 21300)        | 5600 (2800 to 10900)       | 4800 (2300 to 9400)        | 1400 (600 to 3200)      |
| TUR | Turkey                           | EURO  | North Africa/Middle East    | Western Asia                    | 1300000 | 8.5  | 12.0 | 16.4 (10.4 to 25)   | 7.4 (14.1 to 25.1)  | 7.6 (14.1 to 25.1)  | 1.4 (1.6 to 4.1) | 154500 | 210600 (135500 to 325600)    | 95000 (57100 to 150400)    | 97300 (59800 to 154000)    | 18200 (8600 to 37900)   |
| TKM | Turkmenistan                     | EURO  | Asia Central                | Caucasus and Central Asia       | 103913  | 21.9 | 9.8  | 10.0 (6.1 to 16.7)  | 4.4 (7 to 17.4)     | 4.5 (7 to 17.4)     | 1.2 (0.9 to 4.6) | 10200  | 10400 (6300 to 17300)        | 4600 (2500 to 7900)        | 4700 (2500 to 8200)        | 1200 (400 to 3100)      |
| UGA | Uganda                           | AFRO  | Sub-Saharan Africa East     | Sub-Saharan Africa              | 1500000 | 22.6 | 13.6 | 16.1 (9.6 to 27.1)  | 8.1 (18.4 to 26.2)  | 6.8 (18.4 to 26.2)  | 1.1 (1.2 to 4.2) | 208100 | 245700 (144400 to 407200)    | 123400 (64700 to 225200)   | 104700 (54300 to 187100)   | 17500 (6600 to 41300)   |
| ARE | United Arab Emirates             | EMRO  | North Africa/Middle East    | Western Asia                    | 143597  | 5    | 7.6  | 5.6 (3.1 to 10.1)   | 2.3 (3.1 to 11)     | 2.4 (3.1 to 11)     | 0.9 (1 to 2.4)   | 10900  | 8100 (4400 to 14500)         | 3400 (1600 to 6700)        | 3400 (1600 to 6800)        | 1300 (500 to 2700)      |
| TZA | United Republic of Tanzania      | AFRO  | Sub-Saharan Africa East     | Sub-Saharan Africa              | 1800000 | 21.4 | 11.4 | 11.6 (7.1 to 20.1)  | 5.8 (12.5 to 19)    | 4.9 (12.5 to 19)    | 1.0 (0.7 to 3.8) | 210300 | 214400 (128000 to 362400)    | 106300 (55900 to 189800)   | 90200 (46600 to 163100)    | 17800 (5600 to 49300)   |
| URY | Uruguay                          | AMRO  | Latin America Southern      | Latin America and the Caribbean | 49186   | 3.9  | 10.1 | 9.4 (8 to 20.5)     | 5.2 (8.4 to 16.1)   | 3.1 (8.4 to 16.1)   | 1.2 (1.9 to 2.4) | 5000   | 4600 (3900 to 10100)         | 2600 (2000 to 5700)        | 1500 (1200 to 3400)        | 600 (400 to 1100)       |
| UZB | Uzbekistan                       | EURO  | Asia Central                | Caucasus and Central Asia       | 631538  | 13.5 | 8.7  | 9.1 (5.5 to 15.3)   | 4.0 (6.3 to 16.2)   | 4.1 (6.3 to 16.2)   | 1.0 (1 to 3.7)   | 54900  | 57600 (34600 to 96900)       | 25200 (13300 to 44800)     | 25900 (13800 to 45600)     | 6500 (2700 to 14600)    |
| VUT | Vanuatu                          | WPRO  | Oceania                     | Oceania                         | 7087    | 8.8  | 12.9 | 15.2 (9.8 to 23.6)  | 6.8 (12.5 to 23.6)  | 6.9 (12.5 to 23.6)  | 1.5 (1.2 to 6.2) | 900    | 1100 (700 to 1700)           | 500 (300 to 800)           | 500 (300 to 800)           | 100 (36 to 300)         |
| VEN | Venezuela                        | AMRO  | Latin America Central       | Latin America and the Caribbean | 598602  | 8.5  | 9.0  | 8.7 (8.8 to 20.9)   | 4.8 (7.8 to 15)     | 2.8 (7.8 to 15)     | 1.1 (2.6 to 6.5) | 48500  | 52100 (52500 to 125000)      | 28800 (22300 to 64700)     | 16900 (13300 to 38600)     | 6400 (8800 to 31100)    |
| VNM | Viet Nam                         | WPRO  | Asia Southeast              | South-eastern Asia              | 1400000 | 12.4 | 9.4  | 9.4 (5.8 to 15.6)   | 4.1 (6.4 to 16)     | 4.2 (6.4 to 16)     | 1.1 (0.8 to 4.2) | 132400 | 131900 (81000 to 217700)     | 57400 (30900 to 101200)    | 58800 (31600 to 102500)    | 15700 (5200 to 43500)   |
| YEM | Yemen                            | EMRO  | North Africa/Middle East    | Western Asia                    | 726617  | 27   | 13.2 | 32.5 (22.4 to 47.2) | 15.3 (35.1 to 44.8) | 15.7 (35.1 to 44.8) | 1.6 (1.1 to 6.1) | 95900  | 236400 (162500 to 343000)    | 111200 (72800 to 164100)   | 113900 (74300 to 168400)   | 11300 (3900 to 28000)   |
| ZMB | Zambia                           | AFRO  | Sub-Saharan Africa East     | Sub-Saharan Africa              | 582213  | 29.4 | 12.9 | 13.4 (7.8 to 22.5)  | 6.7 (15 to 21.9)    | 5.6 (15 to 21.9)    | 1.1 (0.8 to 4.5) | 75100  | 78000 (45400 to 131200)      | 38700 (20700 to 69500)     | 32900 (16900 to 59000)     | 6400 (1900 to 18400)    |
| ZWE | Zimbabwe                         | AFRO  | Sub-Saharan Africa Southern | Sub-Saharan Africa              | 437601  | 38.8 | 16.6 | 14.3 (8.4 to 24)    | 7.0 (15.8 to 22.8)  | 5.9 (15.8 to 22.8)  | 1.4 (1.7 to 3.7) | 72600  | 62500 (36800 to 104900)      | 30500 (16400 to 54900)     | 25900 (13300 to 46400)     | 6100 (2700 to 12400)    |

#### SOURCES

\* Live births: SOWC 2012; <http://www.unicef.org/sowc2012/statistics.php>

\*\* UN IGME: <http://www.childmortality.org/>

\*\*\* Born too Soon Report: Howson, C.P.; Kinney, M.V.; Lawn, J.E. (Editors). Born too soon: the global action report on preterm birth. World Health Organization, Geneva, Switzerland (2012) 126 pp. ISBN 978 92 4 150343 3
