# Supplementary material for: Estimates of burden and consequences of infants born small for gestational age in low and middle income countries with INTERGROWTH-21st standard: analysis of CHERG datasets
Source: PubMed Central journal article supplement (PMC5558898; doi:10.1136/bmj.j3677), 2017-08-17
Supplement: leea038389.ww6.pdf [file leea038389.ww6.pdf]

**Appendix 6:** Numbers of SGA Infants born in 2012 comparing the INTERGROWTH-21st birth weight standard to the U.S. 1991 birth weight reference [posted as supplied by author]

| UN-MDG Region             | Live Births, n*    | Intergrowth 21st Standard  |                        |                       |                     |                          | U.S. 1991 Reference        |                        |                       |                     |                          |
|---------------------------|--------------------|----------------------------|------------------------|-----------------------|---------------------|--------------------------|----------------------------|------------------------|-----------------------|---------------------|--------------------------|
|                           |                    | Term-SGA-non-LBW Births, n | Term-SGA-LBW Births, n | Preterm-SGA Births, n | Total SGA Births, n | Total SGA Prevalence (%) | Term-SGA-non-LBW Births, n | Term-SGA-LBW Births, n | Preterm-SGA Births, n | Total SGA Births, n | Total SGA Prevalence (%) |
| Caucasus / Central Asia   | 1,774,300          | 87,000                     | 89,100                 | 19,400                | 195,500             | 11.0                     | 134,400                    | 89,600                 | 36,700                | 260,700             | 14.7                     |
| Eastern Asia              | 19,097,200         | 387,400                    | 396,800                | 165,400               | 949,500             | 5.0                      | 598,300                    | 398,900                | 314,000               | 1,311,200           | 6.9                      |
| Latin America / Caribbean | 10,833,300         | 516,300                    | 303,200                | 110,800               | 930,300             | 8.6                      | 842,300                    | 344,000                | 192,800               | 1,379,100           | 12.7                     |
| Northern Africa           | 3,989,800          | 120,900                    | 102,600                | 24,600                | 248,200             | 6.2                      | 247,600                    | 87,000                 | 47,000                | 381,500             | 9.6                      |
| Oceania                   | 266,400            | 20,000                     | 20,400                 | 2,300                 | 42,700              | 16.0                     | 30,800                     | 20,500                 | 4,400                 | 55,700              | 20.9                     |
| South-eastern Asia        | 9,691,100          | 941,700                    | 964,600                | 183,500               | 2,089,900           | 21.6                     | 1,454,600                  | 969,700                | 347,200               | 2,771,500           | 28.6                     |
| Southern Asia             | 36,625,800         | 5,908,500                  | 6,052,100              | 577,100               | 12,537,700          | 34.2                     | 9,126,200                  | 6,084,200              | 1,094,100             | 16,304,400          | 44.5                     |
| Sub-Saharan Africa        | 33,727,500         | 2,829,500                  | 2,400,600              | 345,000               | 5,575,200           | 16.5                     | 5,792,600                  | 2,035,300              | 655,800               | 8,483,700           | 25.2                     |
| Western Asia              | 4,844,900          | 346,000                    | 354,400                | 56,200                | 756,600             | 15.6                     | 534,400                    | 356,300                | 106,200               | 996,900             | 20.6                     |
| <b>LMIC TOTAL</b>         | <b>120,850,200</b> | <b>11,157,400</b>          | <b>10,683,900</b>      | <b>1,484,300</b>      | <b>23,325,600</b>   | <b>19.3</b>              | <b>18,761,400</b>          | <b>10,385,500</b>      | <b>2,797,900</b>      | <b>31,944,800</b>   | <b>26.4</b>              |

\*All numerical estimates were rounded to the nearest 100s.

**Abbreviations:** SGA = Small-for-gestational-age; LBW = Low birth weight (<2500g); LMIC= Low- and middle-income countries; UN-MDG = United Nations Millennium Development Goals
