# Supplementary material for: Estimates of burden and consequences of infants born small for gestational age in low and middle income countries with INTERGROWTH-21st standard: analysis of CHERG datasets
Source: PubMed Central journal article supplement (PMC5558898; doi:10.1136/bmj.j3677), 2017-08-17
Supplement: leea038389.ww8.pdf [file leea038389.ww8.pdf]

**Appendix 8:** Neonatal Deaths in 2012 Attributable to Term-SGA and Preterm-SGA in LMICs comparing the INTERGROWTH-21st birth weight standard to the U.S. 1991 birth weight reference [posted as supplied by author]

| UN-MDG Region             | Live Births, n*    | Neonatal Deaths, n | Intergrowth 21 <sup>st</sup> Standard      |                                        |                                       |                                   |                                                 | U.S. 1991 Reference                        |                                        |                                       |                                   |                                                                                   |
|---------------------------|--------------------|--------------------|--------------------------------------------|----------------------------------------|---------------------------------------|-----------------------------------|-------------------------------------------------|--------------------------------------------|----------------------------------------|---------------------------------------|-----------------------------------|-----------------------------------------------------------------------------------|
|                           |                    |                    | Term-SGA-not-LBW Neonatal Deaths, n (UR**) | Term-SGA-LBW Neonatal Deaths, n (UR**) | Preterm-SGA Neonatal Deaths, n (UR**) | All SGA Neonatal Deaths, n (UR**) | % of neonatal deaths attributable to SGA (UR**) | Term-SGA-not-LBW Neonatal Deaths, n (UR**) | Term-SGA-LBW Neonatal Deaths, n (UR**) | Preterm-SGA Neonatal Deaths, n (UR**) | All SGA Neonatal Deaths, n (UR**) | Population Attributable Fraction: % of neonatal deaths attributable to SGA (UR**) |
| Caucasus / Central Asia   | 1,774,300          | 26,500             | -                                          | 1,500                                  | 2,300                                 | 3,800                             | 14.3                                            | -                                          | 1400                                   | 4,000                                 | 5,500                             | 20.6                                                                              |
| Eastern Asia              | 19,097,200         | 158,900            | -                                          | 4,200                                  | 11,900                                | 16,100                            | 10.1                                            | -                                          | 3900                                   | 21,200                                | 25,100                            | 15.8                                                                              |
| Latin America / Caribbean | 10,833,300         | 105,900            | -                                          | 8,600                                  | 18,700                                | 27,300                            | 25.8                                            | -                                          | 8600                                   | 28,500                                | 37,100                            | 35.0                                                                              |
| Northern Africa           | 3,989,800          | 50,600             | 1,600                                      | 2,700                                  | 900                                   | 5,200                             | 10.3                                            | 3100                                       | 2,215                                  | 1,600                                 | 7,000                             | 13.8                                                                              |
| Oceania                   | 266,400            | 5,700              | -                                          | 500                                    | 400                                   | 900                               | 15.8                                            | -                                          | 500                                    | 700                                   | 1,200                             | 20.6                                                                              |
| South-eastern Asia        | 9,691,100          | 143,900            | -                                          | 14,500                                 | 18,500                                | 33,000                            | 22.9                                            | -                                          | 13,300                                 | 31,800                                | 45,100                            | 31.3                                                                              |
| Southern Asia             | 36,625,800         | 1,127,300          | -                                          | 175,800                                | 113,900                               | 289,700                           | 25.7                                            | -                                          | 162,100                                | 197,200                               | 359,300                           | 31.9                                                                              |
| Sub-Saharan Africa        | 33,727,500         | 1,090,200          | 72,200                                     | 123,200                                | 23,900                                | 219,300                           | 20.1                                            | 137,500                                    | 97,200                                 | 42,400                                | 277,100                           | 25.4                                                                              |
| Western Asia              | 4,844,900          | 63,400             | -                                          | 5,600                                  | 5,400                                 | 11,000                            | 17.4                                            | -                                          | 5,200                                  | 9,500                                 | 14,700                            | 23.2                                                                              |
| <b>LMIC TOTAL</b>         | <b>120,850,200</b> | <b>2,772,400</b>   | <b>73,800</b>                              | <b>336,800</b>                         | <b>195,900</b>                        | <b>606,500</b>                    | <b>21.9</b>                                     | <b>140,600</b>                             | <b>294,500</b>                         | <b>336,900</b>                        | <b>772,000</b>                    | <b>27.8</b>                                                                       |

\*All numerical estimates were rounded to the nearest 100s.

\*\*Uncertainty ranges (UR) were derived with a bootstrap approach (appendix 4).

**Abbreviations:** SGA= Small-for-gestational-age; LMICs= Low- and middle-income countries; UR= uncertainty range; LBW= low birth weight (<2500g); UN-MDG=United Nations Millennium Development Goals
