# Supplementary material for: Estimates of burden and consequences of infants born small for gestational age in low and middle income countries with INTERGROWTH-21st standard: analysis of CHERG datasets
Source: PubMed Central journal article supplement (PMC5558898; doi:10.1136/bmj.j3677), 2017-08-17
Supplement: leea038389.ww9.pdf [file leea038389.ww9.pdf]

**Appendix 9: Neonatal Deaths Averted by Reducing SGA Prevalence to 10% in All LMICs in 2012 [posted as supplied by author]**

| UN-MDG Region             | Live Births 2012, n* | Neonatal Deaths 2012, n | Intergrowth 21 <sup>st</sup> Standard |                                     |                                  |                                     |
|---------------------------|----------------------|-------------------------|---------------------------------------|-------------------------------------|----------------------------------|-------------------------------------|
|                           |                      |                         | Term-SGA-not-LBW, n (UR**)            | Term-SGA-LBW, n (UR**)              | Preterm-SGA, n (UR**)            | All SGA, n (UR**)                   |
| Caucasus / Central Asia   | 1,774,300            | 26,500                  | -                                     | 200 (0 to 1,200)                    | 200 (0 to 2,100)                 | 400 (0 to 2,600)                    |
| Eastern Asia              | 19,097,200           | 158,900                 | -                                     | 100 (0 to 300)                      | 100 (0 to 600)                   | 100 (0 to 700)                      |
| Latin America / Caribbean | 10,833,300           | 105,900                 | -                                     | 600 (400 to 8,300)                  | 300 (100 to 13,600)              | 1,000 (800 to 18,000)               |
| Northern Africa           | 3,989,800            | 50,600                  | 0 (0 to 400)                          | 0 (0 to 700)                        | 0 (0 to 300)                     | 0 (0 to 1,400)                      |
| Oceania                   | 266,400              | 5,700                   | -                                     | 200 (0 to 500)                      | 100 (0 to 400)                   | 300 (100 to 700)                    |
| South-eastern Asia        | 9,691,100            | 143,900                 | -                                     | 7,400 (2,400 to 14,400)             | 2,600 (100 to 18,400)            | 9,900 (4,400 to 26,500)             |
| Southern Asia             | 36,625,800           | 1,127,300               | -                                     | 130,300 (75,000 to 203,100)         | 17,100 (400 to 115,100)          | 147,400 (94,100 to 253,900)         |
| Sub-Saharan Africa        | 33,727,500           | 1,090,200               | 31,700 (4,200 to 75,800)              | 54,200 (6,600 to 128,300)           | 6,100 (500 to 22,400)            | 92,000 (15,600 to 215,100)          |
| Western Asia              | 4,844,900            | 63,400                  | -                                     | 2,600 (1,100 to 5,500)              | 800 (0 to 5,300)                 | 3,400 (1,700 to 8,100)              |
| <b>LMIC TOTAL ***</b>     | <b>120,850,200</b>   | <b>2,772,400</b>        | <b>31,700 (3,800 to 76,100)</b>       | <b>195,600 (114,600 to 311,200)</b> | <b>27,200 (7,700 to 157,300)</b> | <b>254,600 (164,800 to 449,700)</b> |

\*All rounded to the nearest 100s.

\*\*Uncertainty ranges (UR) were derived with a bootstrap approach (appendix 4).

\*\*\*The LMIC total numbers, rounded after summing national estimates, may not equal the sum of rounded regional estimates presented here.

**Abbreviations:** SGA= Small-for-gestational-age; LMICs= Low- and middle-income countries; UR= uncertainty range; UN-MDG= United Nations Millennium Development Goals
